# Supplementary material for: Orobanche cumana-Sunflower Interaction: Histological Dissection of Sunflower Parasitic Resistance Mechanisms
Source: Research Square preprint supplement (doi:10.21203/rs.3.rs-8498337/v1), 2026-01-10
Supplement: Supplementary file 1 [file 1932f6b09948a82a77e34063.docx]

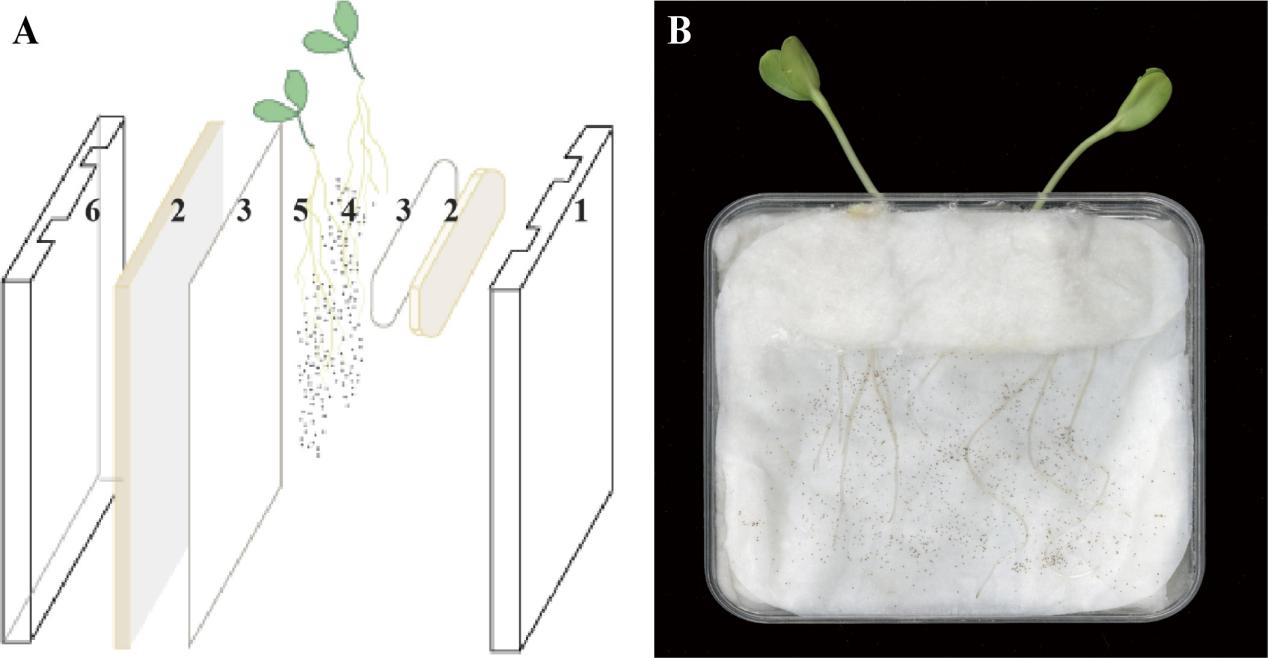


**Supplementary Figure 1** Petri dish-filter paper system. (A) Establishment of Host-Nonhost Interaction System: (1) Cover of culture dish. (2) Defatted cotton. (3) Filter paper. (4) *O. cumana* seeds. (5) Sunflower seedlings. (6) Bottom of culture dish. (B) The interaction process between sunflower and*O. cumana*.


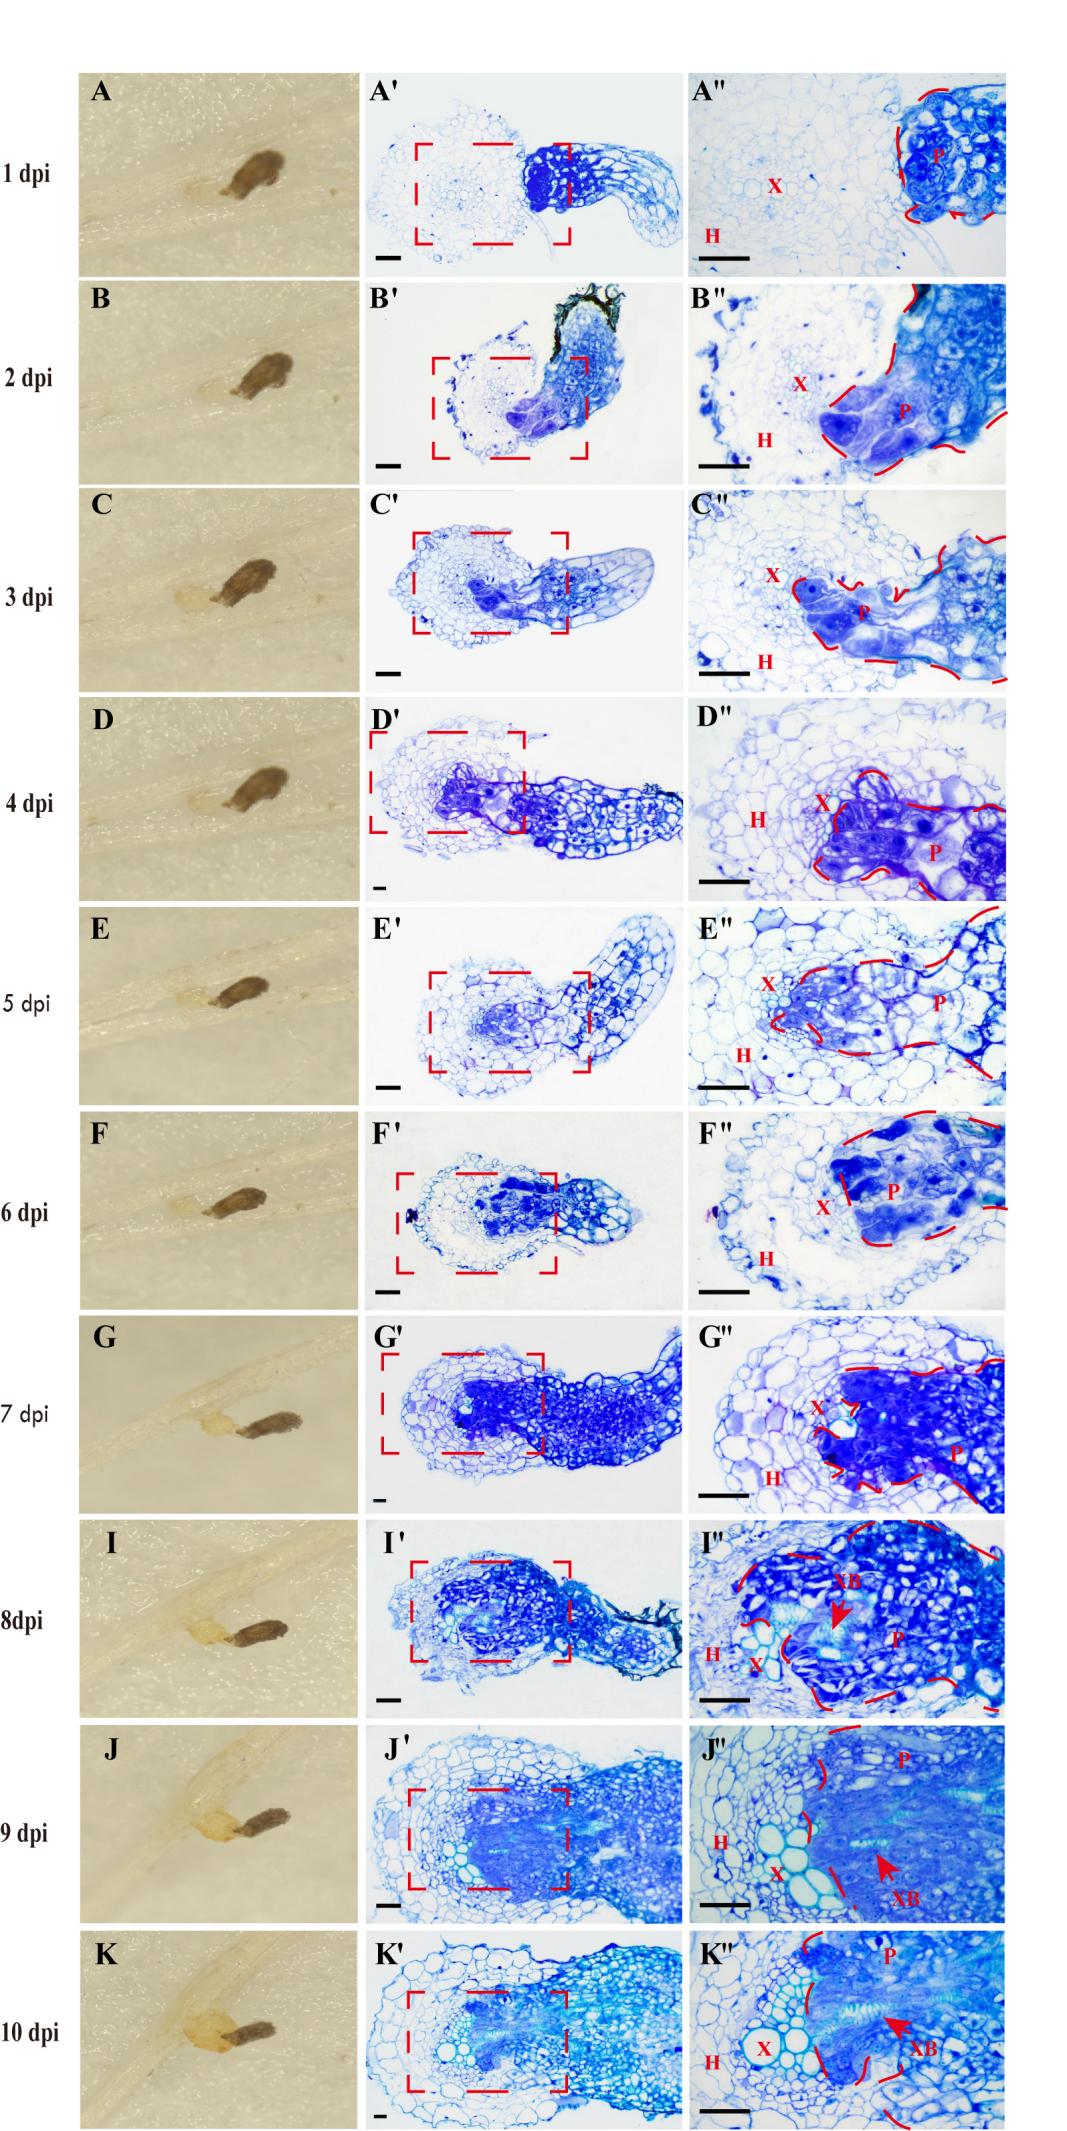


**Supplementary Figure 2** Cytological Observation of Susceptible Host-Parasite Plant Interactions During Parasitization. Image panels: (A–K) Phenotypic images of the parasitic plant infecting the host plant. (A′–K′) 4× magnified semi-thin plastic sections. (A′′–K′′) 40× magnified views of red-oxed areas in (A′–K′). Staining: 0.05% toluidine blue. Labels: H, Host plant; P, Parasitic plant; X, Xylem; XB, Xylem bridge. All scale bars: 50 µm.


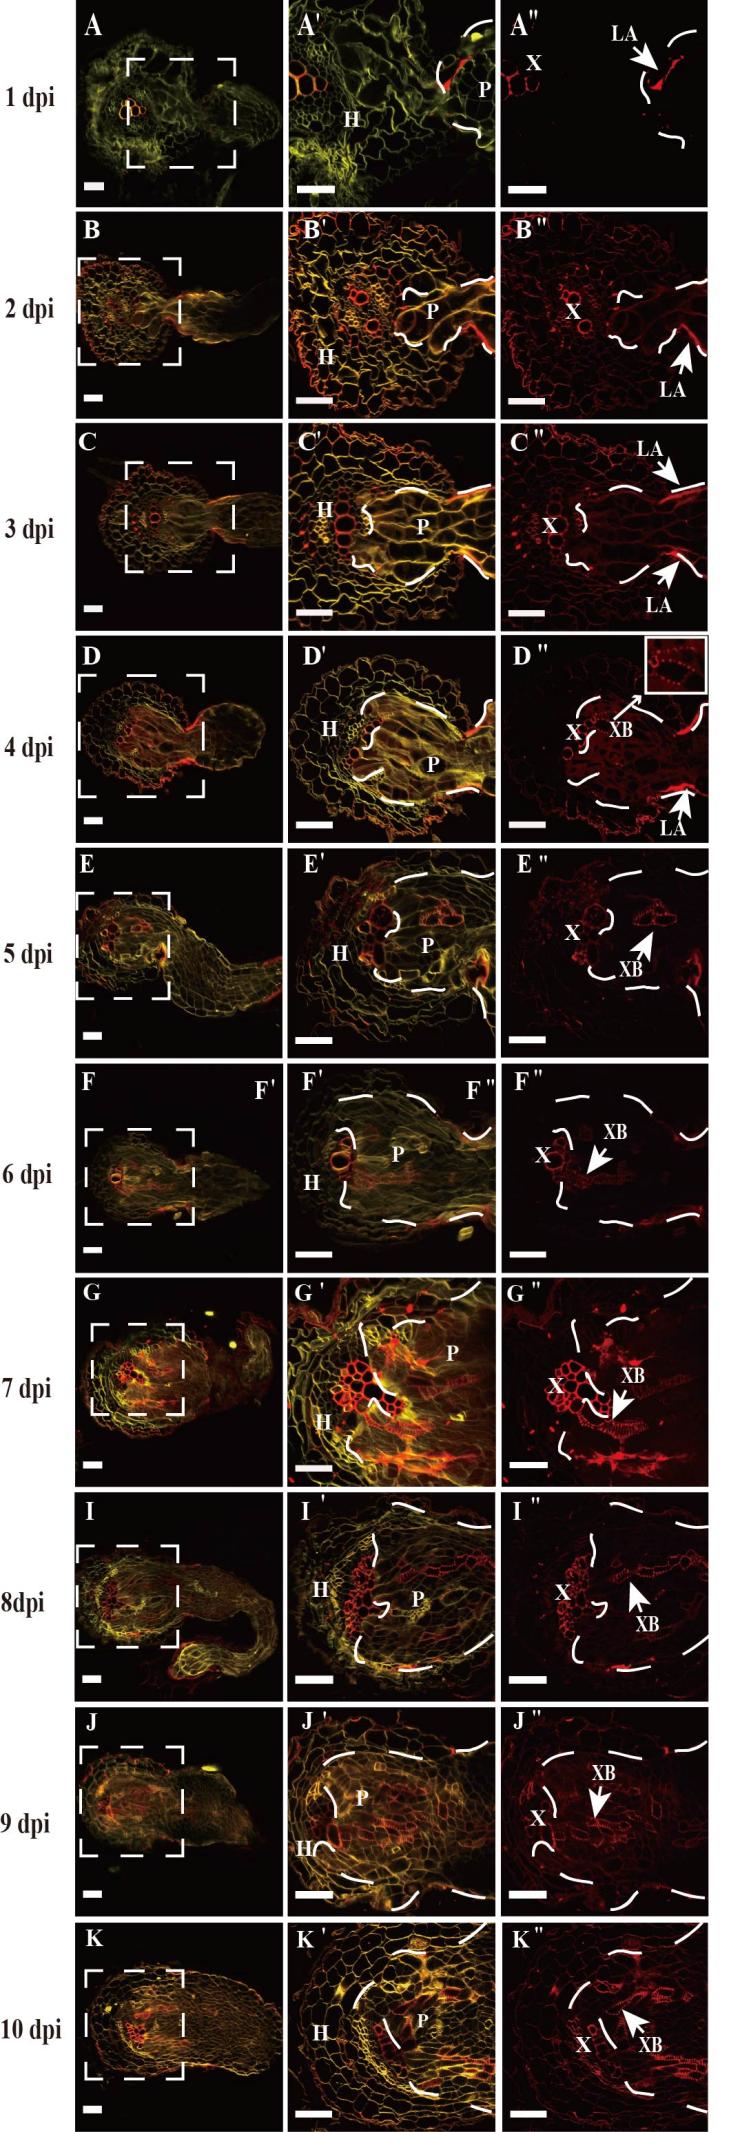


**Supplementary Figure 3** Formation of Xylem Bridge During Parasitization of Susceptible Host-Nonhost. Staining: (A–K′) Direct Yellow for cell walls (yellow). (A–K′′) Basic Fuchsin for lignified xylem bridges (red). Image panels: (A–K) 4× confocal overlay images at different stages. (A′–K′) 40× confocal overlays of red-boxed areas in (A–K). (A′′–K′′) 40× Basic Fuchsin channel images of red-boxed areas. Abbreviations: H, Nonhost plant; P, Parasitic plant; LA, Lignin accumulation; X, Xylem; XB, Xylem bridge.

**
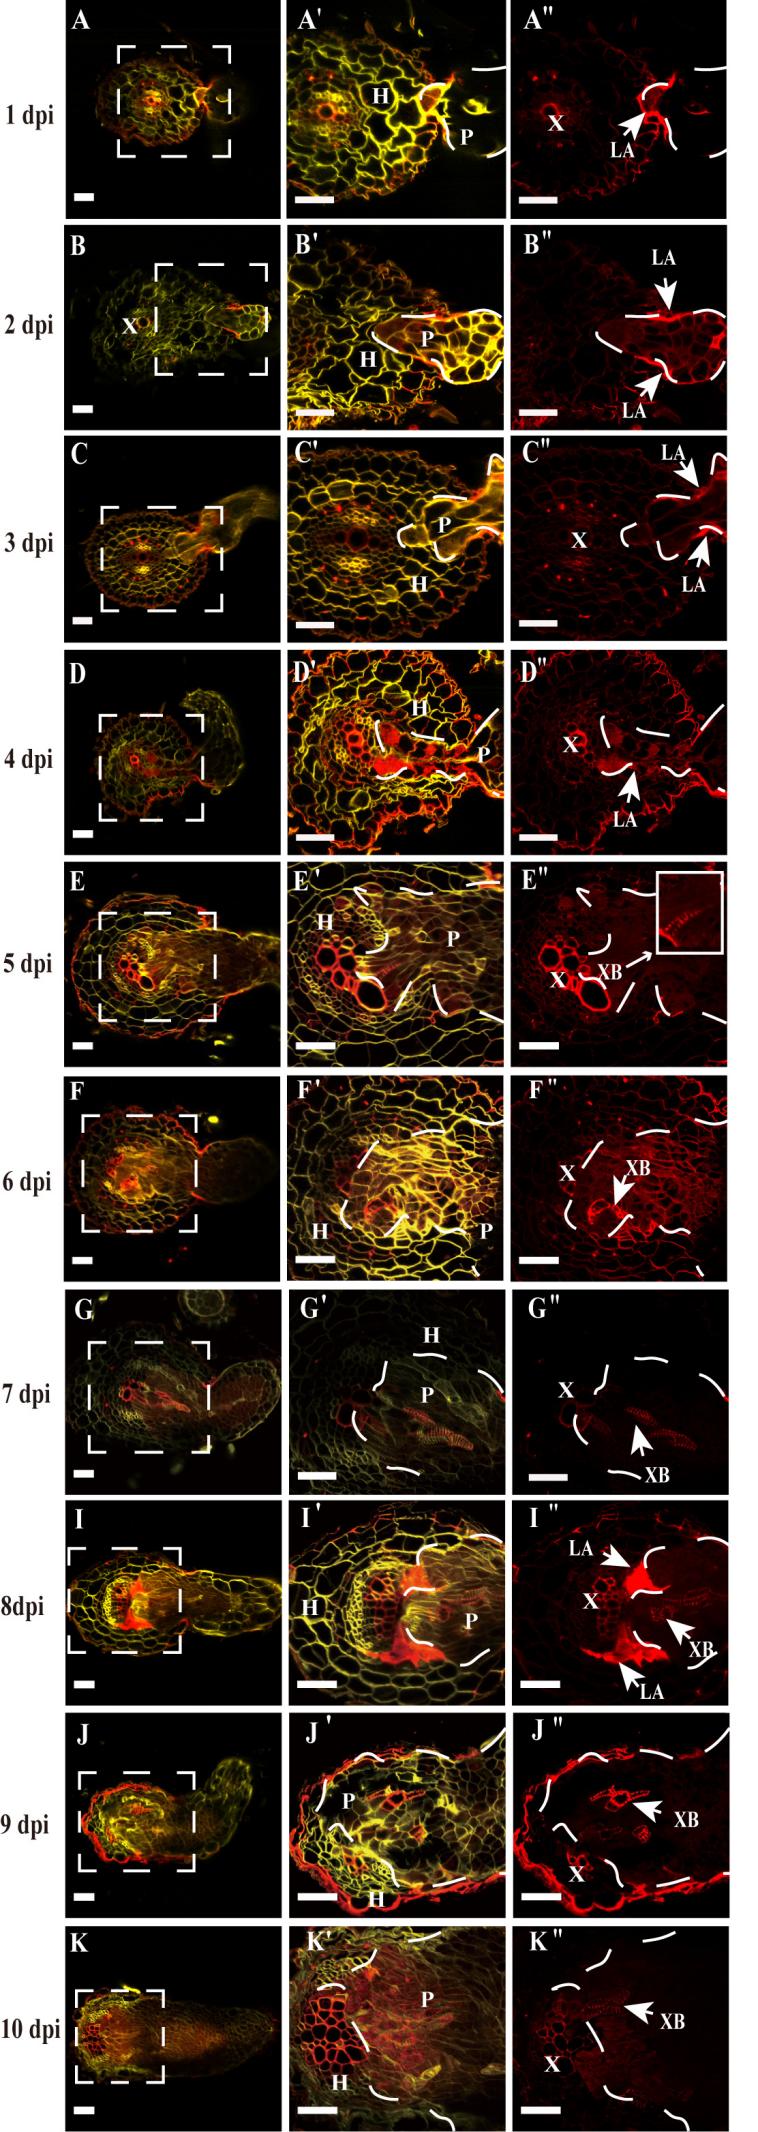
**

**Supplementary Figure 4** Xylem Bridge Formation During Parasitization of Resistant Host-Nonhost Plants. Staining: (A–K′) show cell wall staining with Direct Yellow (yellow); (A–K′′) show lignified xylem bridge staining with Basic Fuchsin (red). Image panels: (A–K) 4× confocal overlay images at different time points. (A′–K′) 40× confocal overlays of white-boxed areas in (A–K). (A′′–K′′) 40× Basic Fuchsin channel images of white-boxed areas in (A–K). Abbreviations: X, Xylem; XB, Xylem bridge; LA, Lignin accumulation; H, Non-host plant; P, Parasitic plant. All scale bars: 50 μm.


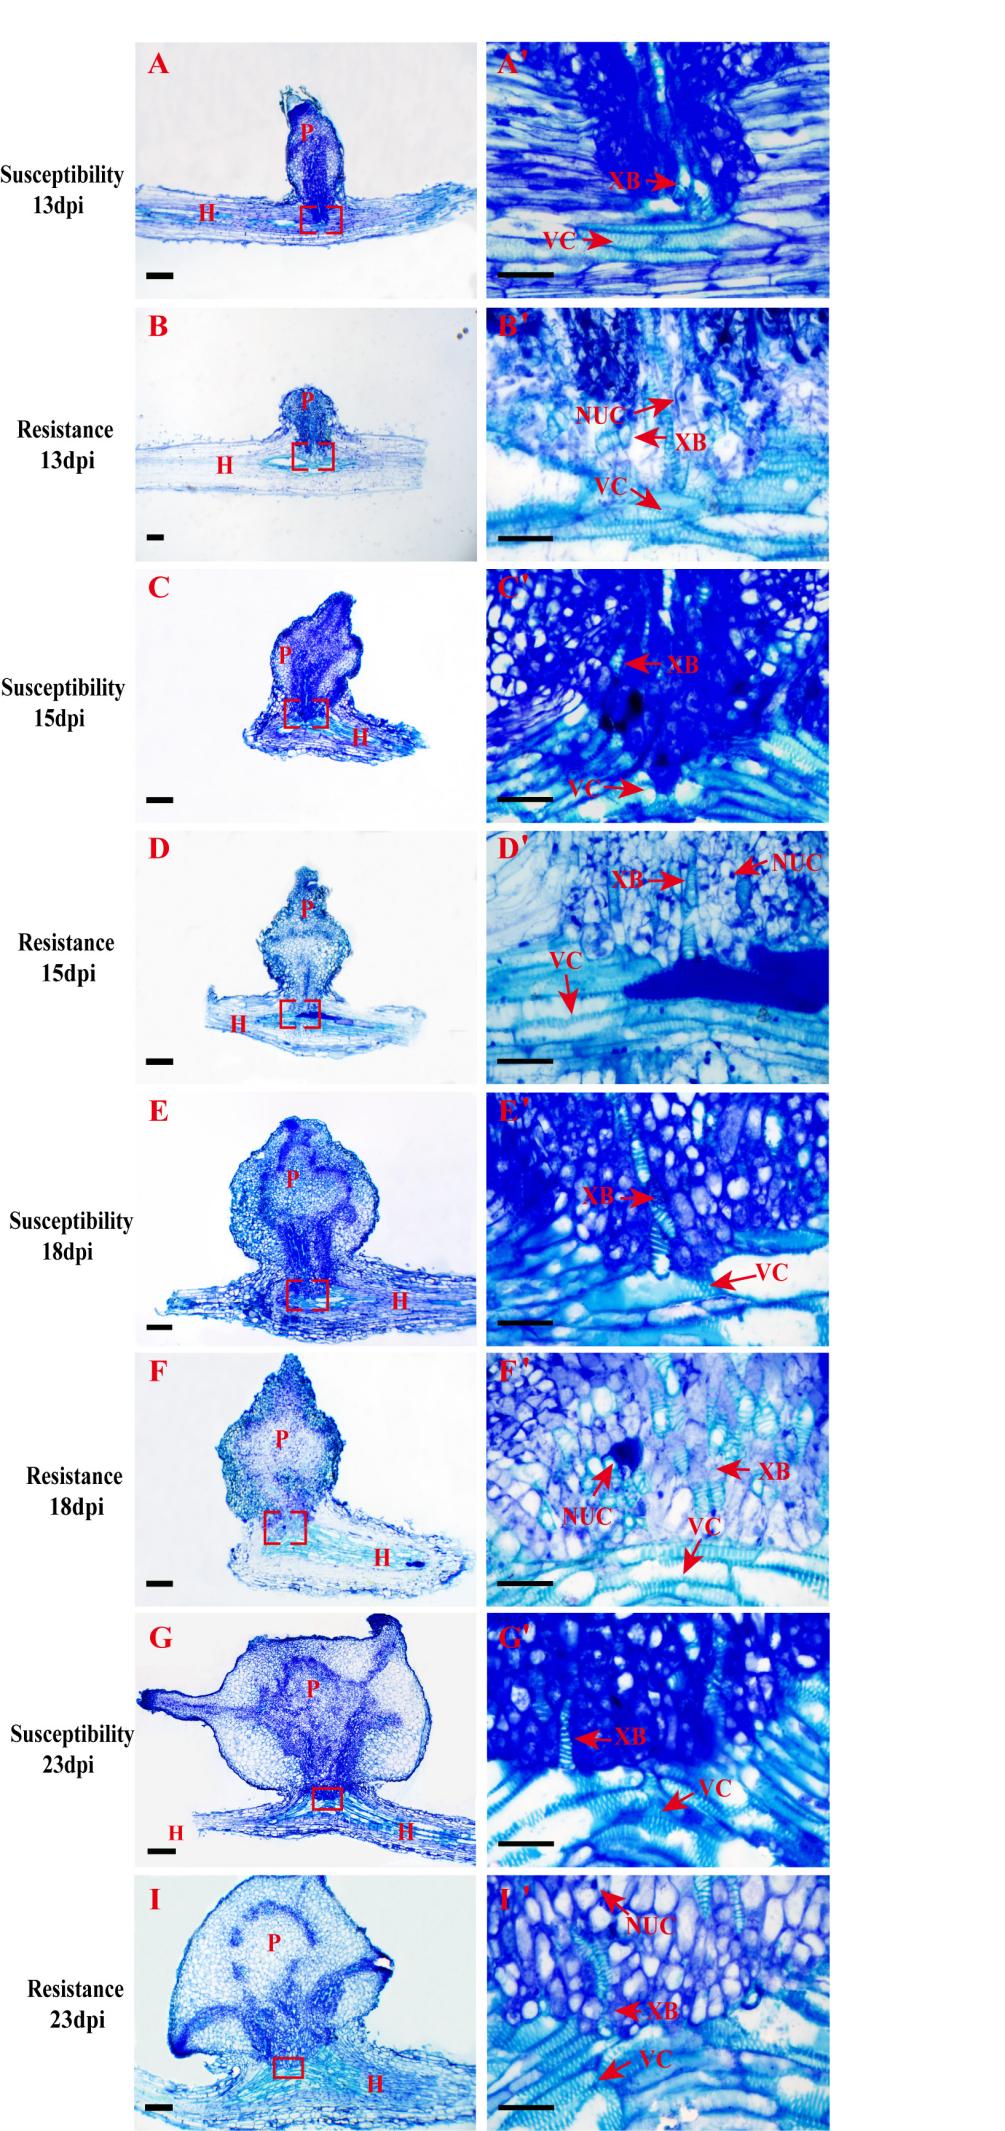


**Supplementary Figure 5** Cytological and histological changes in resistant cultivar JK103 and susceptible cultivar LD5009 following*O. cumana* infection. (A–I) 4× magnified semi-thin plastic sections. (A′–I′) 40× magnified views of red-boxed areas in (A–I). Staining: 0.05% toluidine blue. Labels: XB, Xylem bridge; Nuc: Nucleus; VC: Vascular Connection (containing the xylem bridge and phloem bridge); H, Host plant; P, Parasitic plant; All scale bars: 50 µm.
